# Supplementary material for: Structural plasticity of KIR2DL2 and KIR2DL3 enables altered docking geometries atop HLA-C
Source: PubMed Central journal article supplement (PMC8041999; doi:10.1038/s41467-021-22359-x), 2021-04-12
Supplement: 41467_2021_22359_MOESM1_ESM.pdf [file 41467_2021_22359_MOESM1_ESM.pdf]

a

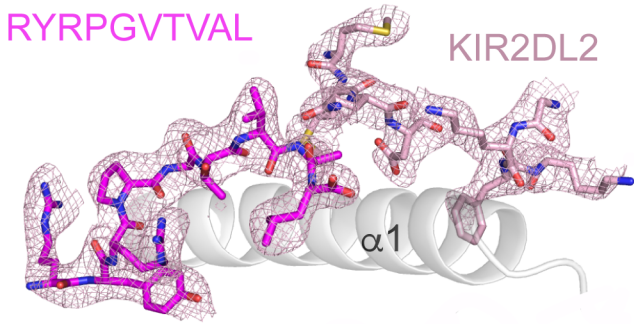

b

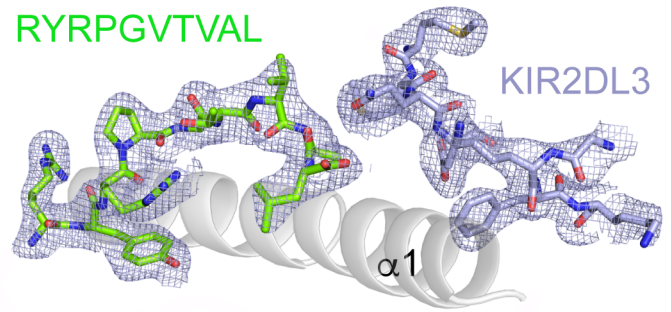

**Supplementary Figure 1.** Representative electron density for the KIR2DL2-HLA-C\*07:02-RL9 and KIR2DL3-HLA-C\*07:02-RL9 complexes. The electron density (shown as mesh) for the RL9 peptide and the C-C' loop of KIR2DL2 (a) and KIR2DL3 (b) are shown from their respective complexes with HLA-C\*07:02-RL9.

**a**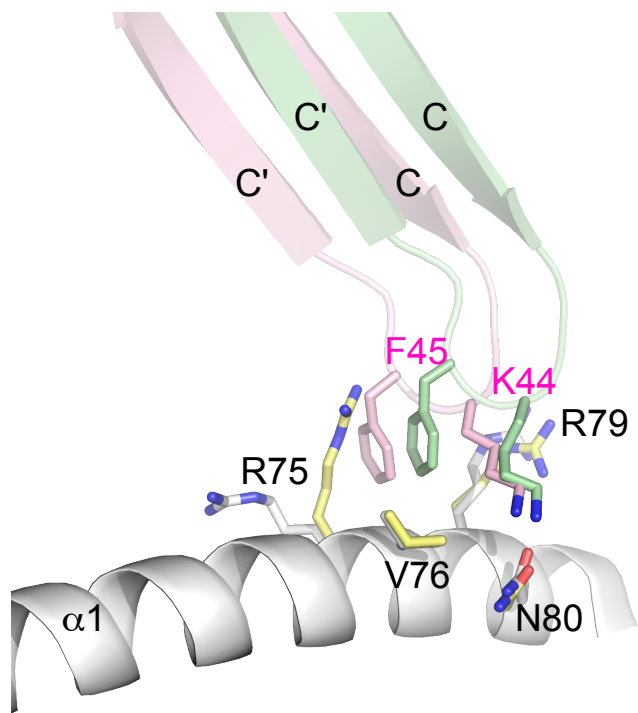**b**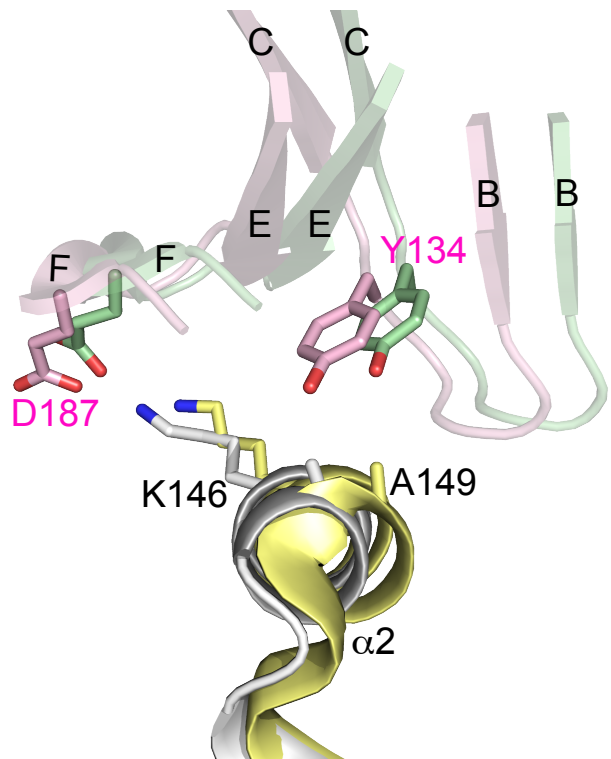**c**

HLA-C\*03:04 C\*07:02 superposition

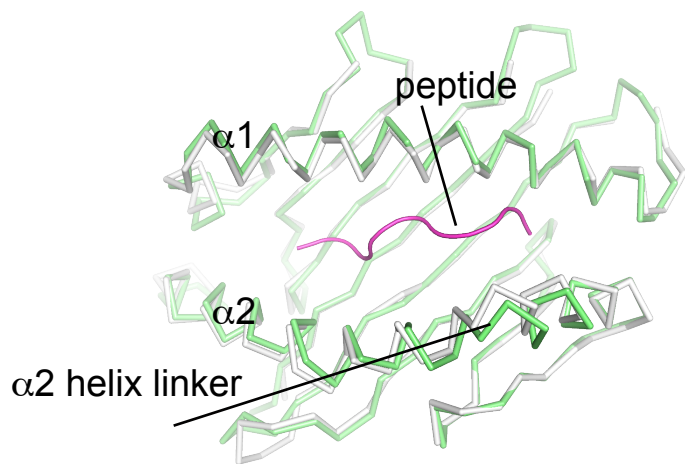

**Supplementary Figure 2.** Differences in KIR2DL2 mediated contacts to HLA-C\*03:04-GL9 and C\*07:02-RL9. KIR2DL2 ternary complexes represented as cartoon, with the HLA-C\*03:04-GL9 complex coloured green and the C\*07:02-RL9 complex coloured pink. (a) A representation of the contacts formed to HLA-C\*07:02-RL9 that are not observed in C\*03:04-GL9. (b) A representation of the contacts formed to HLA-C\*03:04-GL9 that are not observed in C\*07:02-RL9. (c) Superposition of the structures of HLA-C\*07:02-RL9 (grey) and HLA-C\*03:04-GL9 (green) in complex with KIR2DL2. Depicted as C $\alpha$  trace. The wider spacing of HLA-C\*03:04 at the  $\alpha$ 2 helical hinge is highlighted.

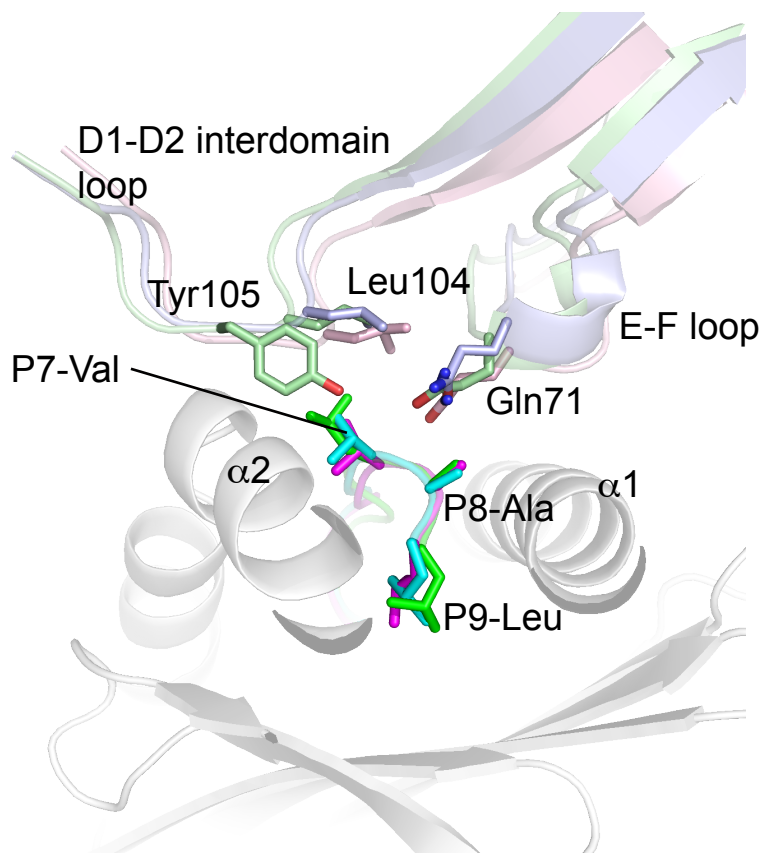

**Supplementary Figure 3.** Contacts between KIR2DL2/2DL3 and the peptides presented by HLA-C\*03:04-GL9 and C\*07:02-RL9. The ternary complexes of KIR2DL2/2DL3 bound to HLA-C\*03:04-GL9 and C\*07:02-RL9 are represented as cartoon. KIR2DL2-C\*03:04-GL9 is coloured green, KIR2DL2-C\*07:02-RL9 is coloured pink, KIR2DL3-C\*07:02-RL9 is coloured blue.

**a**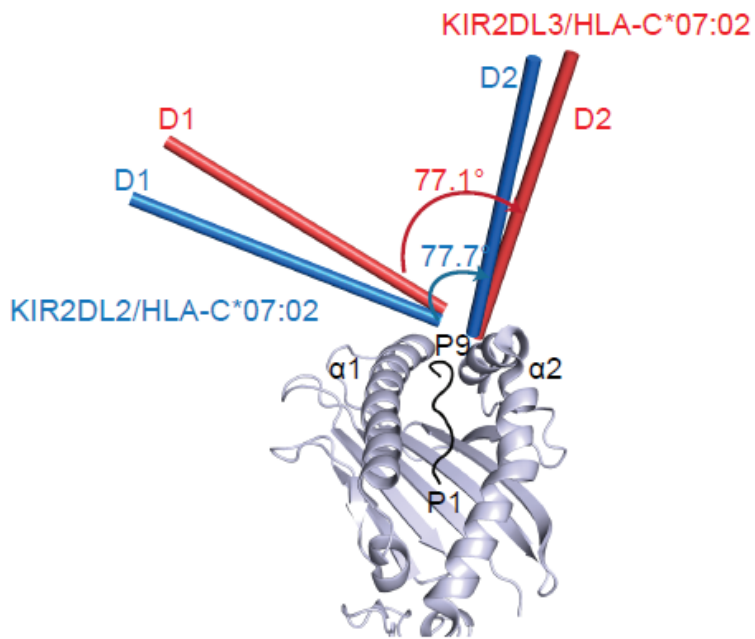**b**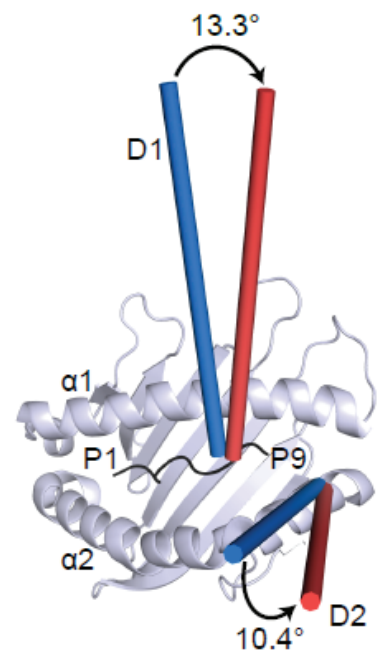**c**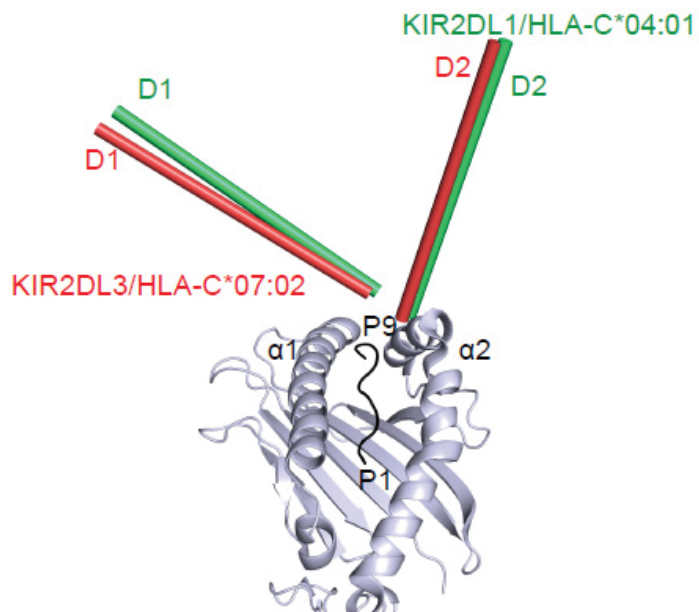**d**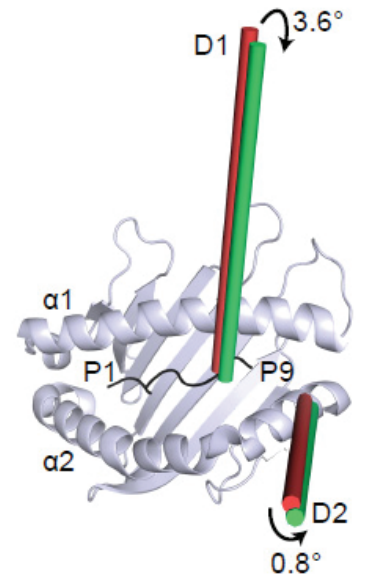

**Supplementary Figure 4.** Comparison of the docking angles of KIR2DL1, 2DL2 and 2DL3 on HLA-C. The D1 and D2 domains of the KIR are represented as principal axes, the HLA and peptides are represented in cartoon format. (a and b) Comparison of KIR2DL2 (blue) and 2DL3 (red) docking angles on HLA-C\*07:02-RL9. (c and d) Comparison of KIR2DL3 (red) docking angles on HLA-C\*07:02-RL9 against 2DL1 (green) on HLA-C\*04:01.



a

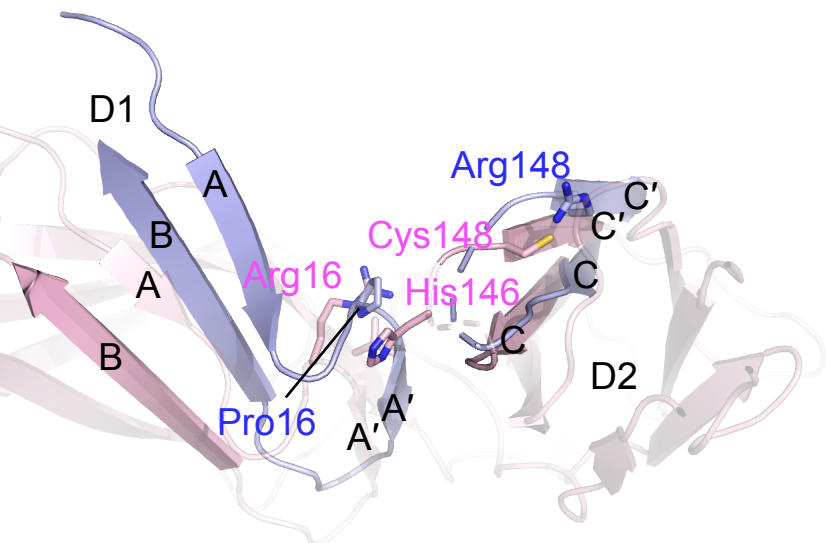

b

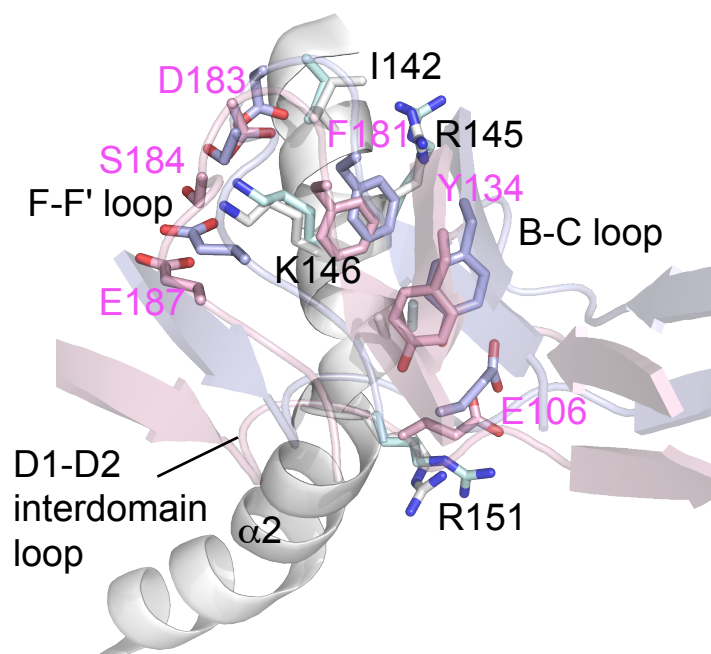

**Supplementary Figure 5.** Differences between KIR2DL2 and KIR2DL3 docking to the  $\alpha 2$ -domain of HLA-C\*07:02-RL9. Comparison of KIR2DL2 (pink) and KIR2DL3 (blue) D2 contacts to the  $\alpha 2$  helix of HLA-C\*07:02-RL9 (KIR2DL2 contacts coloured grey, KIR2DL3 contacts coloured cyan). The D1-D2 linker loop, the B-C loop and F-F' loops are highlighted.

**a** KIR2DL2 vs HLA-C\*07:02-RL9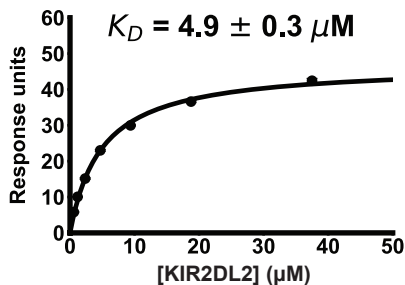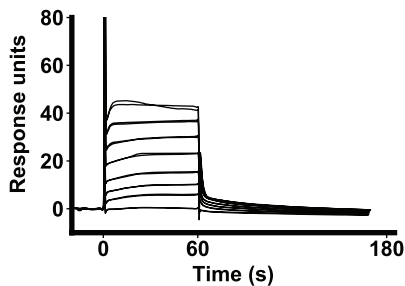

## KIR2DL3 vs HLA-C\*07:02-RL9

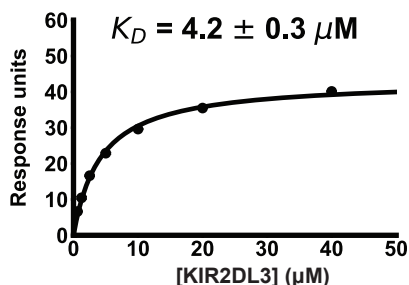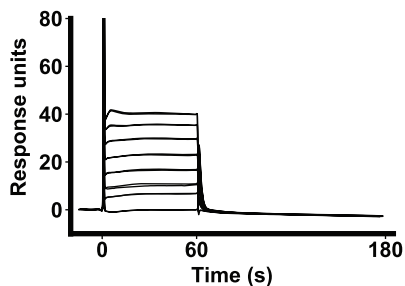**b** KIR2DL2 & KIR2DL3 binding to HLA-C\*07:02-RL9 P7/P8 mutants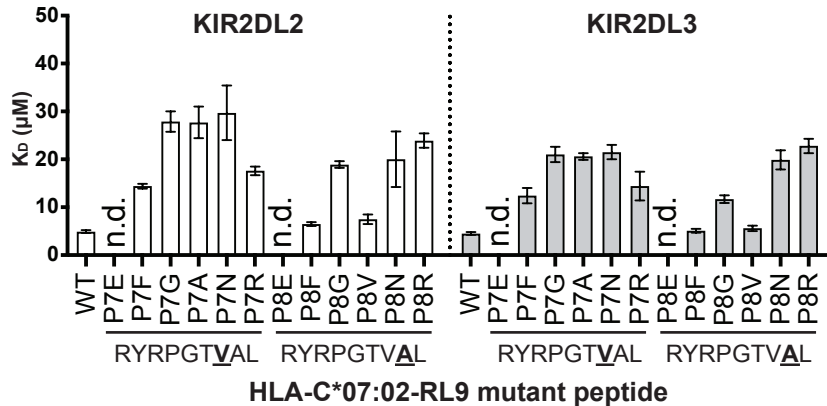

**C****KIR2DL2 vs HLA-C\*07:02 RYR mutants****KIR2DL3 vs HLA-C\*07:02 RYR mutants**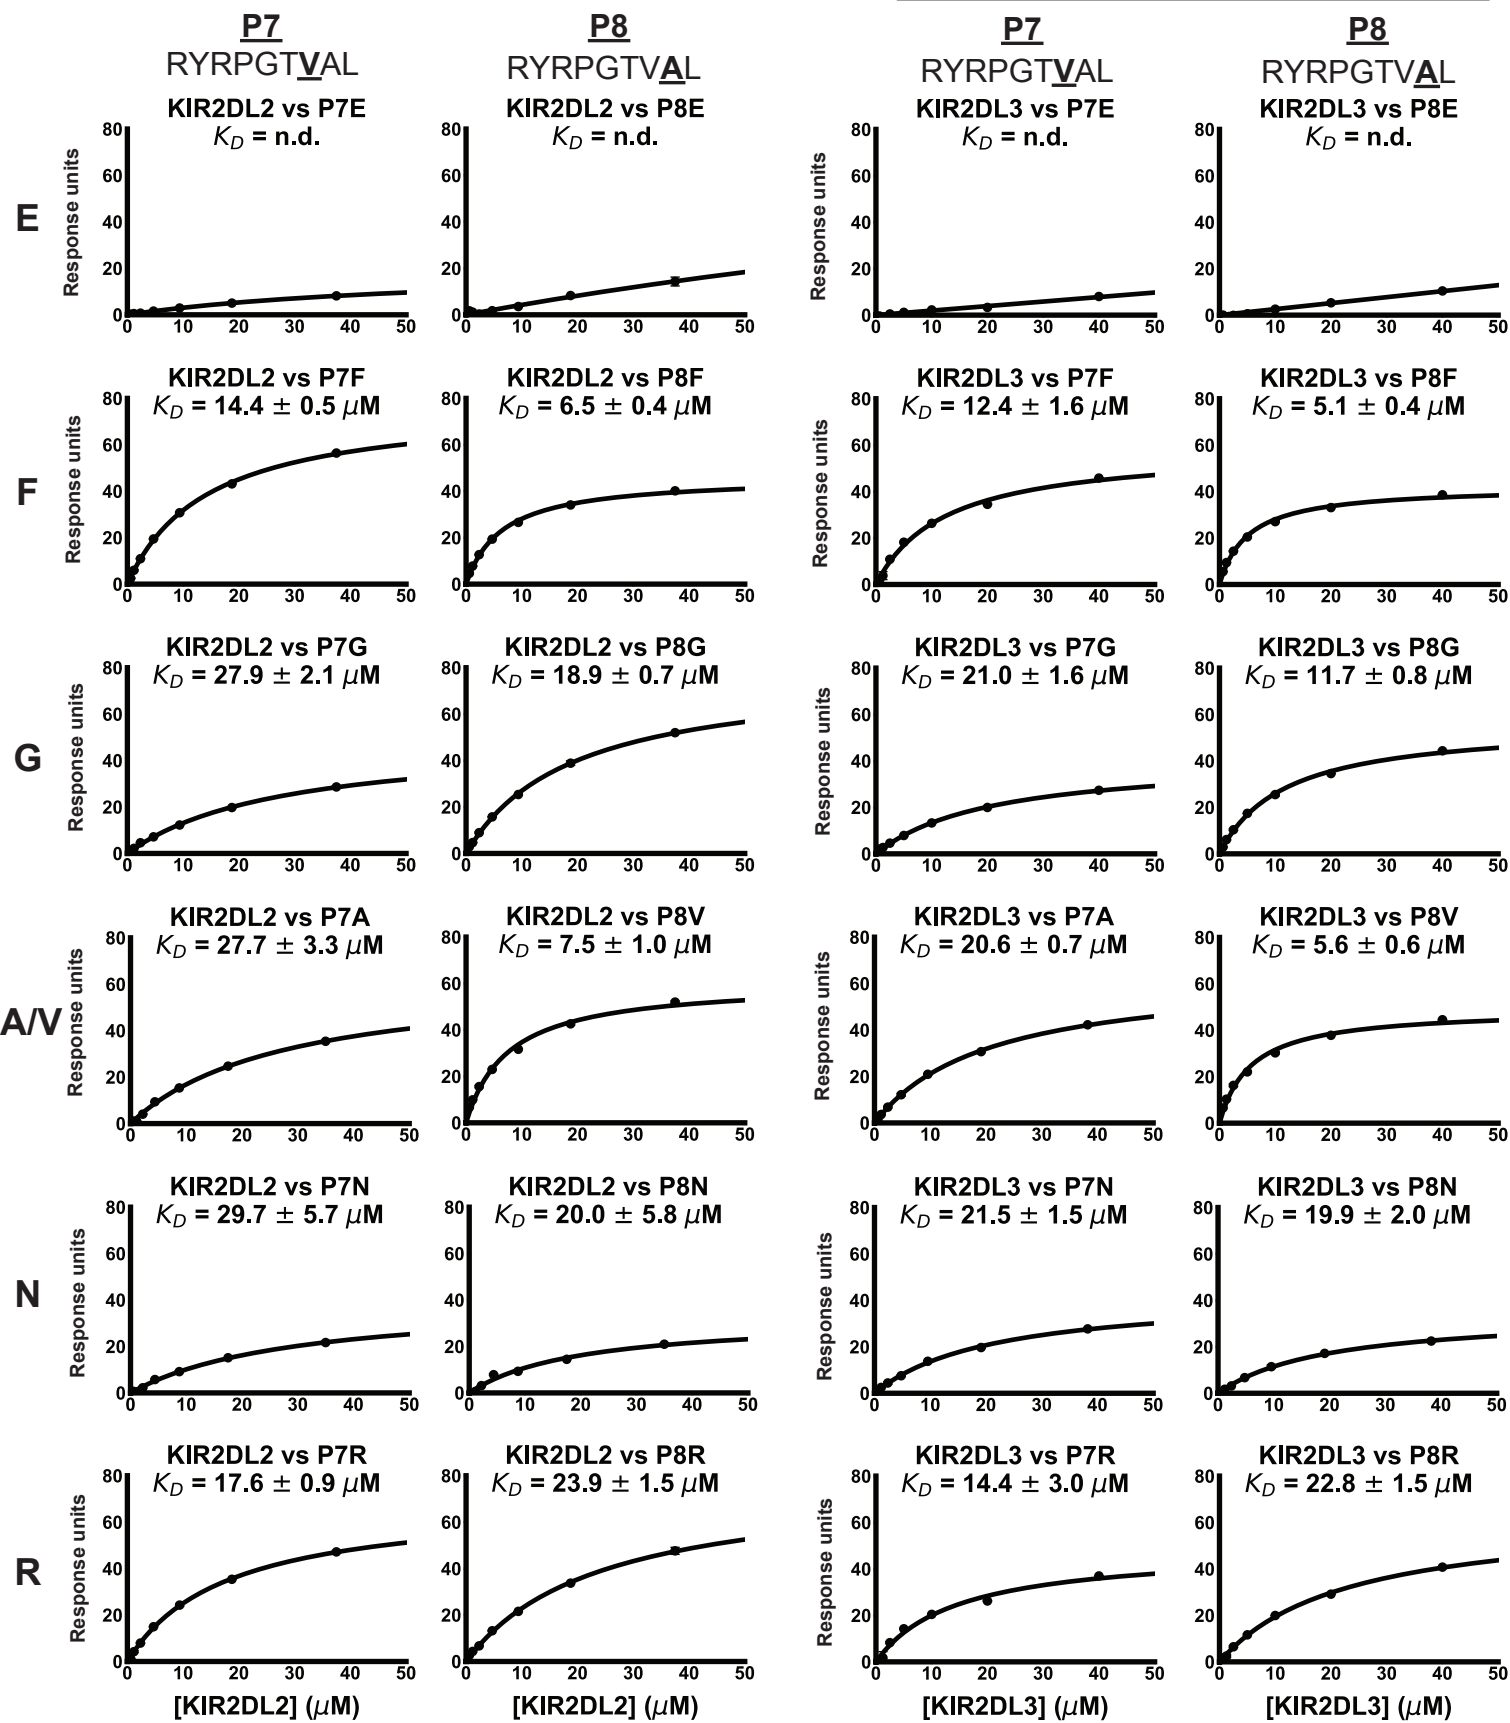

**a****KIR2DL2 vs HLA-C\*07:02 RYR mutants****KIR2DL3 vs HLA-C\*07:02 RYR mutants**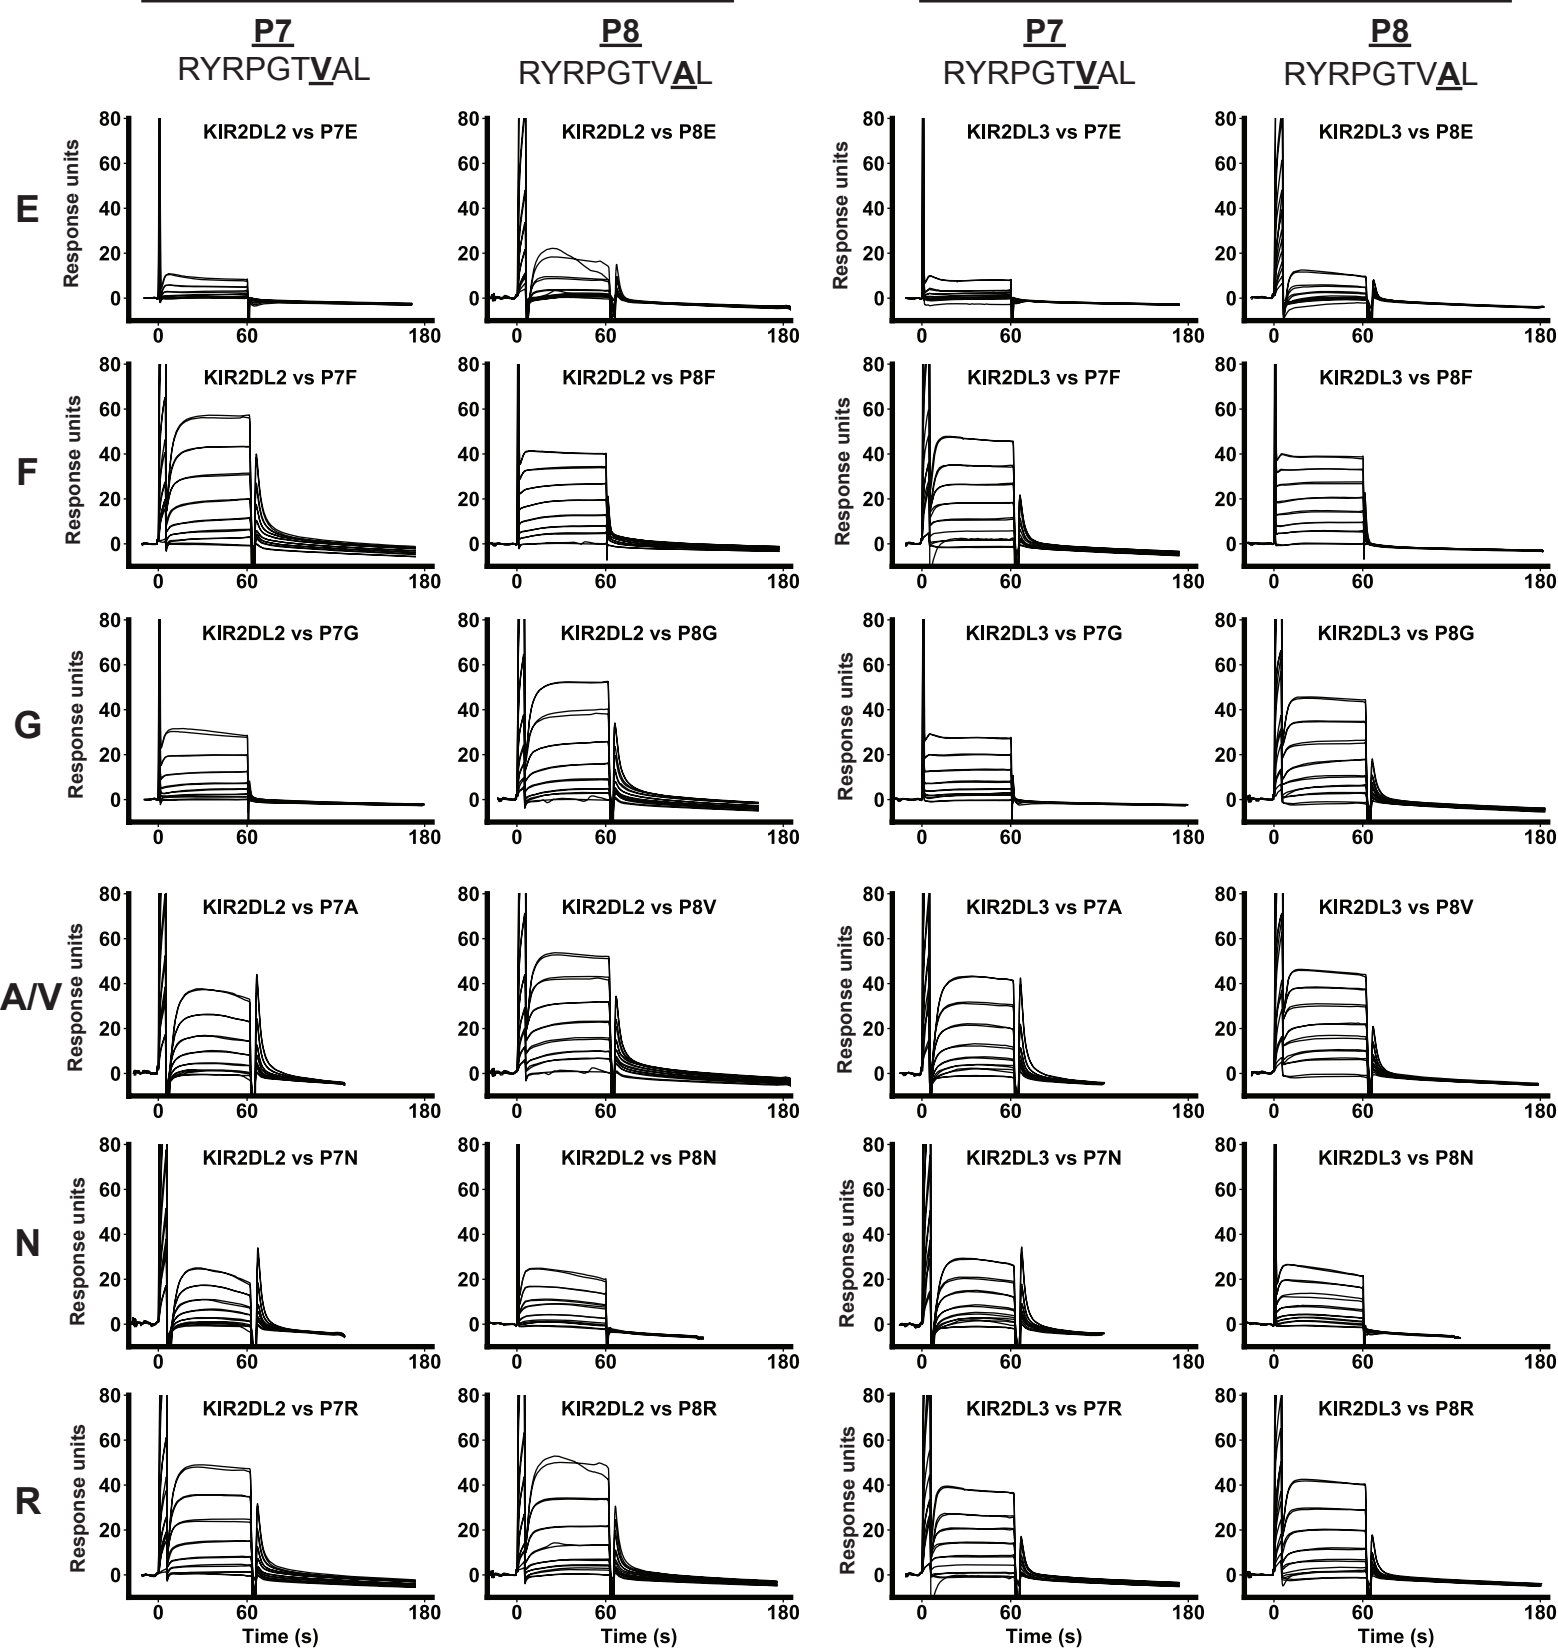

**Supplementary Figure 6.** Surface plasmon resonance measurements of KIR2DL2 and KIR2DL3 binding to HLA-C\*07:02-RL9 mutant peptides. (a) Equilibrium binding analysis (top) of KIR2DL binding to RL9-WT. Mean response at each analyte concentration (circles), standard deviation between  $n=2$  injections (error bars) and non-linear regression curve fit of the one-to-one specific binding model (line) are shown. Calculated  $K_D$  value  $\pm$  standard deviation is denoted inset. Corresponding reference-subtracted sensograms are also shown (bottom). Calculated  $K_D$  values derived from  $n=2$  injections and representative of  $n=2$  independent experiments. (b) Summary of comparative binding of KIR2DL2 and KIR2DL3 to all HLA-C\*07:02-RL9 P7 and P8 mutant peptides tested. Calculated  $K_D$  value (bar lines)  $\pm$  standard deviation of calculated  $K_D$  values (error bars) are plotted. Calculated  $K_D$  values derived from  $n=2$  injections and representative of  $n=2$  independent experiments. (c) Equilibrium binding analysis for data described in (b). (d) Corresponding reference-subtracted sensograms for data described in (b and c).

**a**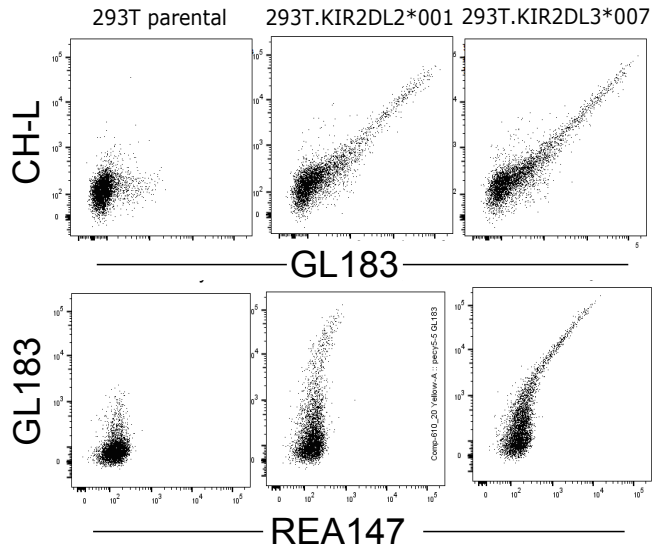**b**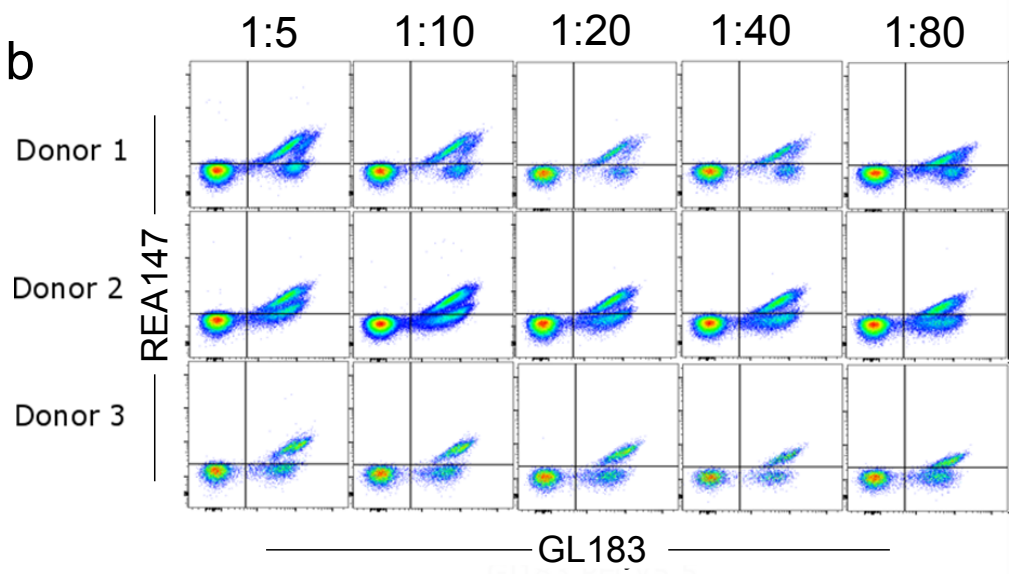

**Supplementary Figure 7.** Assessment of antibody staining. (a) 293T cells were transfected with plasmids encoding KIR2DL2\*001 or KIR2DL3\*007 and were stained with corresponding antibodies, GL183, REA147 and CH-L. (b) Different staining dilutions of REA147 antibody used to stain NK cells from three donors.

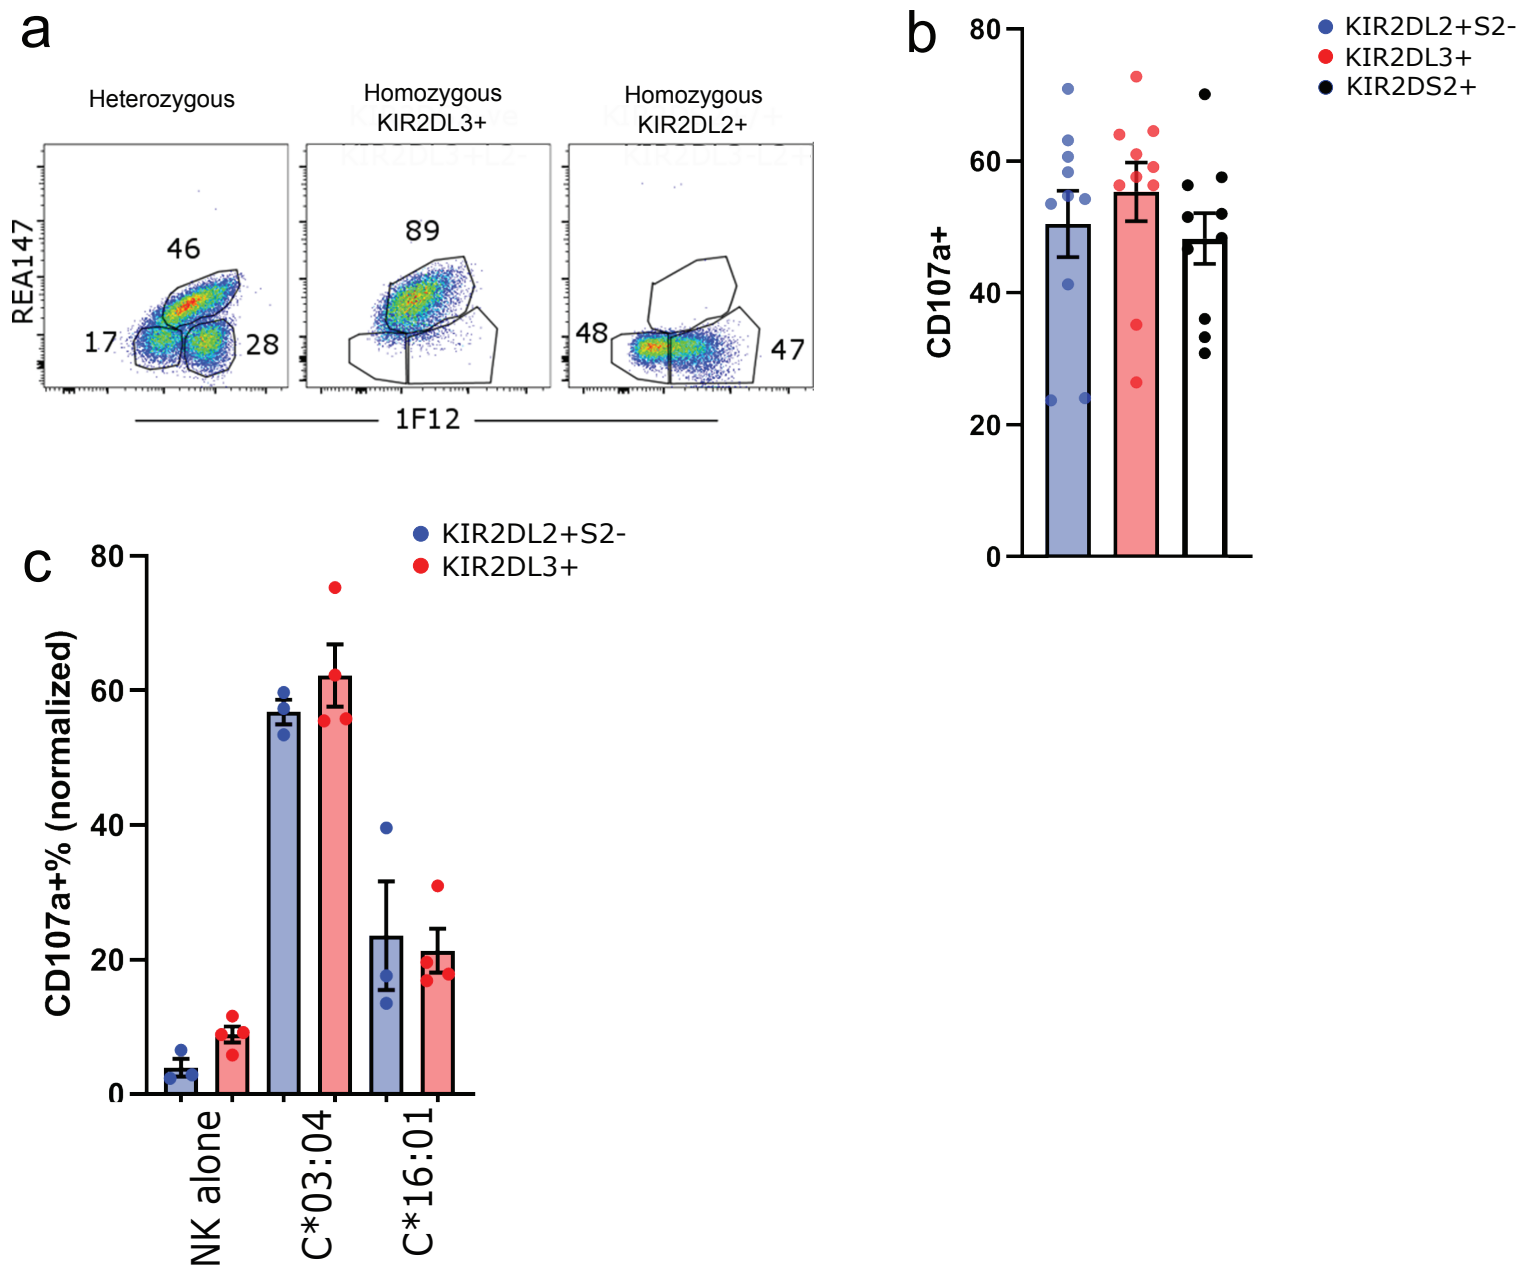

**Supplementary Figure 8.** Identification and functional analyses of KIR2DL2+/KIR2DS2- NK cells. (a) Flow cytometry plots of NK cells from donors heterozygous and homozygous for KIR2DL2/S2 or KIR2DL3, stained with GL183, REA147 and 1F12. Data shown is gated on GL183+ NK cells and excluding KIR2DL1/S1+ cells. (b) The proportion of CD107a+ cells within three subsets of NK cells in response to 721.221 cells; Data is from 10 heterozygous donors (n=10). (c) Degranulation responses of homozygous donors were assessed following co-culture with either un-transfected 221 cells or 221 cells transfected with HLA-C\*03:04 or -C\*16:01 (n=3 for KIR2DL2+S2- and n=4 for KIR2DL3+ populations). Data shown is normalised to the response to untransfected 221 cells. Errors bars are mean values +/- SEM.

a

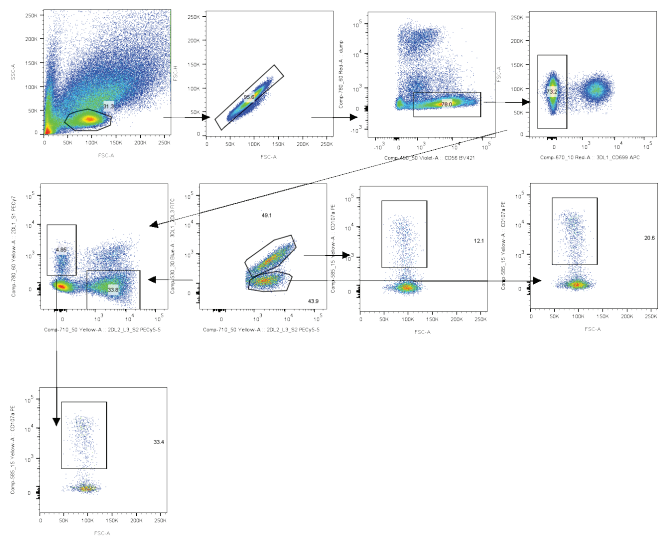

b

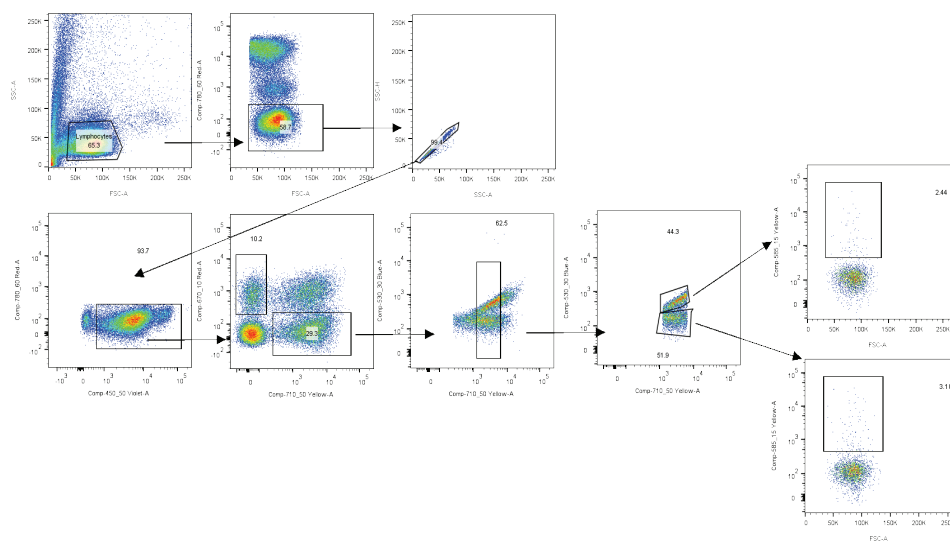

c

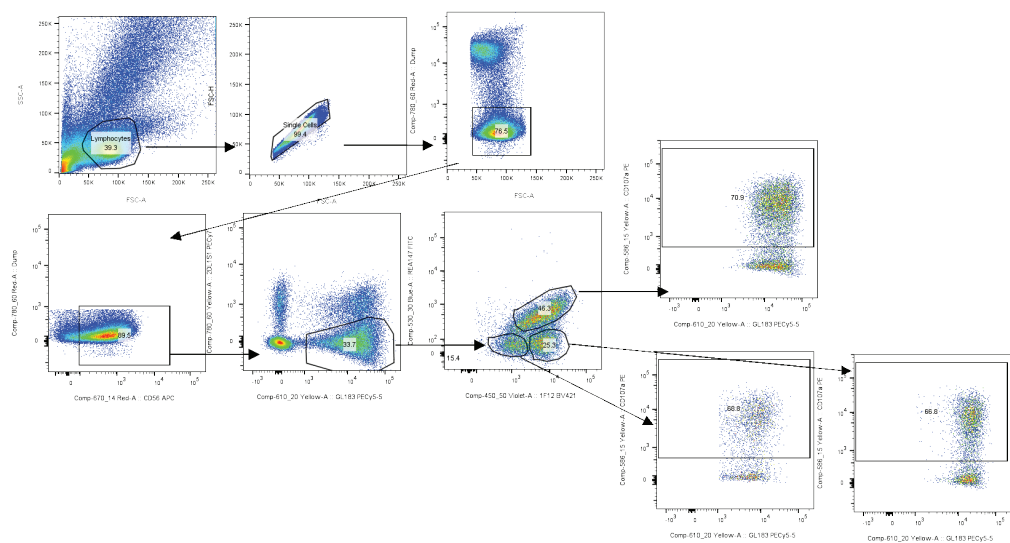

d

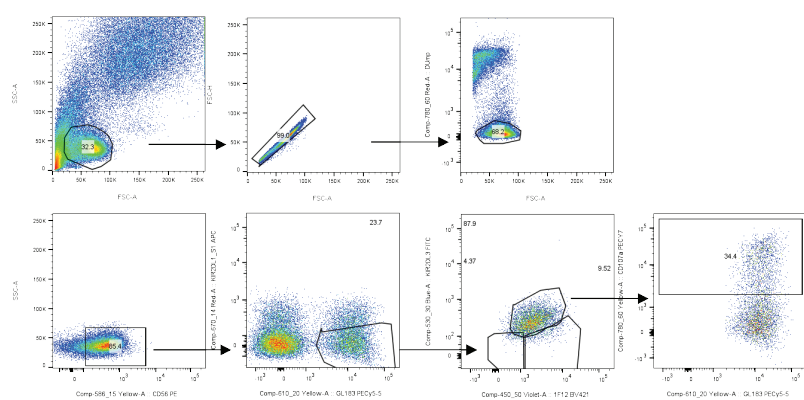

**Supplementary Figure 9.** Gating strategy used for NK subset analyses. (a) Gating strategy for Figure 5c and 5d. (b) Gating strategy for Figure 5f. (c) Gating strategy for Figure 6 and Supplementary Figures 8a and 8b (heterozygous). (d) Gating strategy for Supplementary Figures 8a and 8c (homozygous).



Supplementary Table.1 Data collection and refinement statistics for KIR2DL2 and 2DL3 in complex with HLAC\*07:02-RL9

| Data collection statistics             | KIR2DL2                                                               | KIR2DL3                                                                  |
|----------------------------------------|-----------------------------------------------------------------------|--------------------------------------------------------------------------|
| Temperature (K)                        | 100                                                                   | 100                                                                      |
| X-ray source                           | MX1<br>Australian Synchrotron                                         | MX1<br>Australian Synchrotron                                            |
| Space group                            | <i>P</i> 2 <sub>1</sub>                                               | <i>P</i> 6 <sub>4</sub>                                                  |
| Cell Dimensions (Å)                    | <i>a</i> =68.5<br><i>b</i> =82.1<br><i>c</i> =104.9<br>$\beta$ =90.1° | <i>a</i> =111.8<br><i>b</i> =111.8<br><i>c</i> =87.9<br>$\gamma$ =120.0° |
| Resolution (Å)                         | 32.32 – 3.0<br>(3.12 – 3.0)                                           | 32.57 - 2.50<br>(2.6 - 2.50)                                             |
| Total no. observations                 | 90401(8384)                                                           | 131580(13083)                                                            |
| No. unique observations                | 20697 (2015)                                                          | 21403 (2136)                                                             |
| Multiplicity                           | 4.0 (3.8)                                                             | 3.1 (3.0)                                                                |
| Data completeness (%)                  | 96.7 (90.5)                                                           | 98.5 (98.7)                                                              |
| <i>I</i> / $\sigma$ <i>I</i> (Average) | 4.6 (1.8)                                                             | 14.2 (6.8)                                                               |
| Rmerge <sup>1</sup> (%)                | 0.24 (0.88)                                                           | 0.055 (0.23)                                                             |
| Refinement statistics                  |                                                                       |                                                                          |
| Rfactor <sup>2</sup> (%)               | 0.2501                                                                | 0.2263                                                                   |
| Rfree (%)                              | 0.2936                                                                | 0.2565                                                                   |
| Non-hydrogen atoms                     | 9022                                                                  | 4517                                                                     |
| Macromolecules                         | 9022                                                                  | 4478                                                                     |
| Protein residues                       | 1118                                                                  | 553                                                                      |
| Water                                  | 0                                                                     | 39                                                                       |
| r.m.s.d. from ideality                 |                                                                       |                                                                          |
| Bond lengths (Å)                       | 0.004                                                                 | 0.003                                                                    |
| Bond angles (°)                        | 0.85                                                                  | 0.65                                                                     |
| Ramachandran plot                      |                                                                       |                                                                          |
| Favoured regions (%)                   | 95                                                                    | 96                                                                       |
| Allowed regions (%)                    | 5                                                                     | 4                                                                        |
| Outliers (%)                           | 0                                                                     | 0                                                                        |
| B-factors (Å <sup>2</sup> ) (Average)  | 46.4                                                                  | 67.6                                                                     |

$$^1 R_{\text{merge}} = \frac{\sum_{\text{hkl}} \sum_j |I_{\text{hkl},j} - \langle I_{\text{hkl}} \rangle|}{\sum_{\text{hkl}} \sum_j I_{\text{hkl},j}}$$

$$^2 R_{\text{factor}} = \frac{\sum_{\text{hkl}} \left( |F_o| - |F_c| \right)}{\sum_{\text{hkl}} |F_o|} \text{ for all data excluding the 5\% that comprised the } R_{\text{free}} \text{ used for cross-validation}$$

Supplementary Table 2. KIR2DL residue contacts with HLA-C molecules

| HLA residues |          |                   |                   | KIR2DL2/3 residues                        |                                           |                                                       |                                           |
|--------------|----------|-------------------|-------------------|-------------------------------------------|-------------------------------------------|-------------------------------------------------------|-------------------------------------------|
| C*03:04      | C*04:01  | C*07:02<br>(2DL2) | C*07:02<br>(2DL3) | 2DL2<br>(C*03:04)                         | 2DL1<br>(C*04:01)                         | 2DL2<br>(C*07:02)                                     | 2DL3<br>(C*07:02)                         |
|              |          | Pro 20            |                   |                                           |                                           | Phe 45                                                |                                           |
| Arg 69*      | Arg 69   | Arg 69            | Arg 69*           | Glu 21*<br>Met 70                         | Arg 68                                    | Glu 21*<br>Met 70                                     | Glu 21*<br>Met 70                         |
| Gln 72*      | Gln 72*  | Gln 72            |                   | Met 70<br>Asp 72*                         | Arg 68*                                   | Met 70<br>Gln 71<br>Asp 72                            |                                           |
| Arg 75       | Arg 75   | Arg 75            | Arg 75*           | Phe 45<br>Asp 72                          | Phe 45                                    | Phe 45                                                | Phe 45<br>Asp 72*                         |
| Val 76       | Val 76   | Val 76            | Val 76            | Phe 45<br>Gln 71<br>Asp 72                | Met 44<br>Phe 45<br>Asp 72                | Lys 44<br>Phe 45<br>Gln 71<br>Asp 72<br>Glu 187       | Phe 45                                    |
| Arg 79       | Arg 79   | Arg 79*           | Arg 79*           | Lys 44<br>Phe 45                          | Met 44<br>Phe 45                          | Lys 44*<br>Phe 45                                     | Lys 44*<br>Phe 45                         |
| Asn 80*      | Lys 80*  | Asn 80*           | Asn 80*           | Lys 44*<br>Ser 184                        | Met 44<br>Gln 71<br>Ser 184*<br>Glu 187*  | Lys 44*<br>Ser 184                                    | Lys 44*                                   |
| Tyr 84       | Tyr 84*  | Tyr 84            | Tyr 84<br>Ile 142 | Asp 183                                   | Asp 183*                                  | Asp183                                                | Asp 183<br>Asp 183                        |
| Arg 145*     | Arg 145* | Arg 145*          | Arg 145*          | Ser 133*<br>Asp 135*                      | Ser 133*<br>Asp 135*                      | Ser 133*<br>Asp 135*                                  | Ser 133<br>Asp 135*<br>Phe 181            |
| Lys 146*     | Lys 146* | Lys 146*          | Lys 146*          | Tyr 105<br>Phe 181<br>Asp 183*<br>Ser 184 | Tyr 105<br>Phe 181<br>Asp183*<br>Ser 184  | Tyr 105<br>Phe 181<br>Asp 183*<br>Ser 184*<br>Glu 187 | Tyr 105<br>Phe 181<br>Asp 183*            |
| Ala 149*     | Ala 149* | Ala 149*          | Ala 149*          | Tyr 105<br>Glu 106*<br>Ser 132            | Tyr 105<br>Glu 106*<br>Ser 132<br>Tyr 134 | Tyr 105<br>Glu 106*<br>Ser 132<br>Tyr 134<br>Phe 181  | Tyr 105<br>Glu 106*<br>Ser 132<br>Phe 181 |
| Ala 150      | Ala 150  | Ala 150           | Ala 150           | Leu 104<br>Tyr 105                        | Leu 104                                   | Leu 104<br>Tyr 105                                    | Leu 104<br>Tyr 105                        |
| Arg 151*     | Arg 151  | Arg 151           |                   | Glu 106*                                  | Glu 106                                   | Glu 106                                               |                                           |
| Peptide      |          |                   |                   |                                           |                                           |                                                       |                                           |
| C*03:04      | C*04:01  | C*07:02<br>(2DL2) | C*07:02<br>(2DL3) | 2DL2<br>(C*03:04)                         | 2DL1<br>(C*04:01)                         | 2DL2<br>(C*07:02)                                     | 2DL3<br>(C*07:02)                         |
| Leu 7        |          | Val 7             | Val 7             | Gln 71<br>Leu 104<br>Tyr 105              |                                           | Gln 71<br>Leu 104                                     | Leu 104                                   |
| Ala 8*       | Lys 8    | Ala 8*            | Ala 8             | Gln71*                                    | Gln 71                                    | Gln 71*                                               | Gln 71                                    |

\*Includes a H-bond or salt-bridge interaction with this residue

Supplementary Table 3. Primers for KIR2DL2 and KIR2DL3 mutagenesis.

| Name              | Sequence                                  |
|-------------------|-------------------------------------------|
| Glu21Ala-Forward  | cgctggtgaaatcagcagagacagtcacctg           |
| Glu21Ala-Reverse  | caggatgactgtctctgtgattcaccaggcg           |
| Lys44Ala-Forward  | ccttctgcacagagaagggcggttaaggacactttgcac   |
| Lys44Ala-Reverse  | gtgcaaagtgtccttaaacgcccttctctgtgcagaagg   |
| Phe45Ala-Forward  | tctgcacagagaaggggaaggtaaggacactttgcacctc  |
| Phe45Ala-Reverse  | gaggtgcaaagtgtccttagccttcccttctctgtgcaga  |
| Met70Ala-Forward  | ctccatcgggtccatggcgcaagaccttgagg          |
| Met70Ala-Reverse  | ccctgcaaggtcttgcgcatgggaccgatggag         |
| Gln71Ala-Forward  | catcggtcccatgatggcagaccttgaggacc          |
| Gln71Ala-Reverse  | ggtcctgcaaggtctgcatcatgggaccgatg          |
| Asp72Ala-Forward  | gtcccatgatgcaagccttgaggaccta              |
| Asp72Ala-Reverse  | taggtccctgcaagggcttgcacatgggac            |
| Leu104Ala-Forward | ggacatcgtcatcacaggtgcatatgagaaccttctctc   |
| Leu104Ala-Reverse | gagagaaggttctcatatgcacctgtgatgacgatgtcc   |
| Tyr105Ala-Forward | gacatcgtcatcacaggtctagctgagaaccttctctc    |
| Tyr105Ala-Reverse | tgagagagaaggttctcagctagacctgtgatgacgatgtc |
| Glu106Ala-Forward | tcacacaggtctatatgcgaaaccttctctcagc        |
| Glu106Ala-Reverse | gctgagagagaaggttgcacatagacctgtgatga       |
| Ser132Ala-Forward | tcctgcagctcccggcctctatgacatgtac           |
| Ser132Ala-Reverse | gtacatgtcataggaggcccgggagctgcagga         |
| Ser133Ala-Forward | gcagctcccggagcgcctatgacatgtacc            |
| Ser133Ala-Reverse | ggtacatgtcataggcgctccgggagctgc            |
| Asp135Ala-Forward | tcccggagctcctatgcatgtaccatctatcc          |
| Asp135Ala-Reverse | ggatagatggtacatggcataggagctccggga         |
| Phe181Ala-Forward | gaacctacagatgcttcggctctgccgtgactctcc      |
| Phe181Ala-Reverse | ggagagtacgggcagagccgaagcatctgtaggttc      |
| Asp183Ala-Forward | tcggctcttccgtgccttccatcacgagtg            |
| Asp183Ala-Reverse | cactcgtatggagaggcacggaaagagccga           |
